# Supplementary material for: Thermosensitive micellar hydrogel for enhanced anticancer therapy through redox modulation mediated combinational effects
Source: Royal Society of Chemistry journal article supplement (doi:10.1039/c7ra06357a), 2017-01-01

Supplementary Information

**Thermosensitive Micellar Hydrogel for Enhanced Anticancer Therapy through Redox Modulation Mediated Combinational Effects**

Zhiyu Guan<sup>a##</sup>, Lijun Yang<sup>b#</sup>, Weiwei Wang<sup>c</sup>, Jun Zhang<sup>a</sup>, Jinjian Liu<sup>b</sup>, Chunhua Ren<sup>b</sup>, Shuo Wang<sup>a</sup>, Yang Gao<sup>b</sup>, Pingsheng Huang<sup>c\*</sup>

<sup>a</sup> Department of Thoracic Surgery, the Second Hospital of Tianjin Medical University, Tianjin 300211, P.R. China. E-mail: guanzy69@163.com

<sup>b</sup> Tianjin Key Laboratory of Radiation Medicine and Molecular Nuclear Medicine, Institute of Radiation Medicine, Chinese Academy of Medical Sciences & Peking Union Medical College, Tianjin 300192, P.R. China.

<sup>c</sup> Tianjin Key Laboratory of Biomaterial Research, Institute of Biomedical Engineering, Chinese Academy of Medical Sciences and Peking Union Medical College, Tianjin 300192, P.R. China. E-mail: sheng1989.2008@163.com

# These authors contributed equally in the present work.

## Supplementary Information

The synthetic route and chemical structure of PECT copolymer.

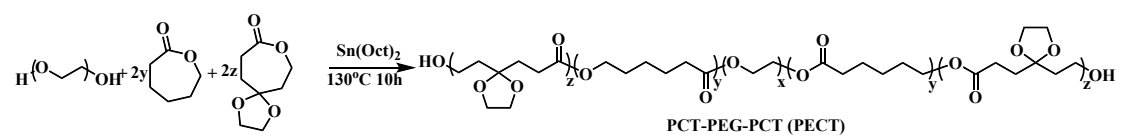

Supplement: c7ra06357a1.pdf [file c7ra06357a1.pdf]
